1 **High fat and low carbohydrate supplies are linked to decreased epilepsy**  
2 **disease burden globally**

3 Duan Ni, PhD<sup>1,2,3</sup>, Alistair Senior, PhD<sup>3,4,5</sup>, David Raubenheimer, PhD<sup>3,4</sup>, Stephen J. Simpson,  
4 PhD<sup>3,4</sup>, Ralph Nanan, Dr. med. Habil (Germany)<sup>1,2,3,\*</sup>

5 1 Sydney Medical School Nepean, The University of Sydney, Sydney, NSW, Australia

6 2 Nepean Hospital, Nepean Blue Mountains Local Health District, Sydney, NSW, Australia

7 3 Charles Perkins Centre, The University of Sydney, Sydney, NSW, Australia

8 4 School of Life and Environmental Sciences, The University of Sydney, Sydney, NSW,  
9 Australia

10 5 Sydney Precision Data Science Centre, The University of Sydney, Sydney, NSW, Australia

11 \* Correspondence:

12 Ralph Nanan

13 [ralph.nanan@sydney.edu.au](mailto:ralph.nanan@sydney.edu.au)

14 Sydney Medical School Nepean, The University of Sydney.

15 Nepean Hospital, Level 5, South Block, Penrith NSW, 2751, Australia

16 Telephone: +61 2 4734 1614

17 Fax: +61 2 4734 1144

18

19

20

21

22

## 23 **Abstract**

### 24 **Objectives**

25 Epilepsy is one of the major neural disorders globally. Ketogenic diets with high fat, low  
26 carbohydrate and moderate to low protein contents are well-established as interventions for  
27 epilepsy, particularly the intricate ones, exemplifying that modifying dietary compositions might  
28 have profound effects on established epilepsy. However, most of the diet-related epilepsy  
29 interventions have focused on individual nutrients or specific diets with set nutrient compositions.  
30 An important unanswered question is whether specific macronutrient exposure through diets and  
31 food environments are linked to epilepsy and could potentially extend to primary preventive  
32 qualities.

### 33 **Methods**

34 Macronutrient supply, gross domestic product (GDP), and epilepsy disease burden data were  
35 collated from more than 150 countries spanning from 1990 to 2018. Nutritional geometry  
36 generalized additive mixed models (GAMMs) were carried out for analysis.

### 37 **Results**

38 GAMM modelling unravelled the interactive effects of nutrient supplies and socioeconomic  
39 status on epilepsy disease burden. Carbohydrate supply was associated with increased epilepsy  
40 while fat supply had the opposite effect. A high fat low carbohydrate supplies dietary  
41 environment, similar to ketogenic diets, was linked to the lowest epilepsy disease burden. These  
42 associations were conserved across sexes and were not confounded by the total energy supply.

### 43 **Conclusions**

44 A high fat low carbohydrate supplies dietary environment is associated with decreased epilepsy  
45 disease burden, hinting a plausible primary preventive role. This might expand the clinical  
46 application of ketogenic diets and inform future nutrient-based epilepsy treatment and/or  
47 prevention.

48

49

50

51 We read with interest the study by Qiao *et al.*, “Ketogenic diet-produced  $\beta$ -hydroxybutyric acid  
52 accumulates brain GABA and increases GABA/glutamate ratio to inhibit epilepsy”<sup>1</sup>. Their study provides  
53 mechanistic insights into the well-established therapeutic effects of ketogenic diets for epilepsy<sup>2,3</sup>.

54 This study exemplified that modifying dietary macronutrient compositions, like ketogenic diets with high  
55 fat, low carbohydrate contents, and moderate to low protein, might have profound effects on established  
56 epilepsy. However, the majority of diet-related epilepsy interventions have concentrated on individual  
57 macro- or micro-nutrients or specific diets with set nutrient compositions<sup>3,4</sup>. An important unanswered  
58 question is whether specific macronutrient exposures via diets and food environments are linked to  
59 epilepsy, and thus could potentially extend to primary preventive qualities.

60 Here, harnessing nutritional geometry, a multi-dimensional analytical framework for disentangling  
61 relationships between dietary mixtures and outcomes like diseases, we analyzed global associations  
62 between nutrient supplies, a proxy for nutritional environments, and epilepsy disease burden. Importantly,  
63 our analyses used generalized additive mixed models (GAMMs), which account for interactions between  
64 nutrients, including their non-linear effects, which underly many facets of health and diseases, and adjust  
65 for potential confounding effects from socioeconomic wealth<sup>5</sup>.

66 Idiopathic epilepsy disease burden data was retrieved from the Global Burden of Disease database.  
67 Nutrient supply and global gross domestic product (GDP) data, as an indicator of the socioeconomic  
68 wealth, were obtained as previously described<sup>6,7</sup>. An array of GAMMs were utilized for the analyses of  
69 the impacts from nutrient supplies and GDP on epilepsy disease burden globally over time.

70 As shown in Figure 1A, globally, epilepsy prevalence and incidence steadily increased from 1990 to 2018.  
71 This is accompanied with concurrent increases in global GDP and changing nutritional supply landscapes,  
72 with the most striking increase in fat supply (Figure 1B). Epilepsy incidence exhibits a heterogenous  
73 global distribution, affecting most countries. In 2018, there are 159 countries with data records, and the  
74 highest incidence was reported in Saudi Arabia, and the lowest was in Kiribati (Figure 1C).

75 To interrogate the potential associations between epilepsy disease burden and nutrient supplies, a series of  
76 GAMMs were explored, which included combinations of factors including nutrient-nutrient interactions,  
77 as well as changes over time and impacts from socioeconomic status. A model considering the  
78 interactions between macronutrient supplies and GDP, with an additive effect of time was favoured  
79 (Supplementary Table1, 3), illustrating the interactive effects of macronutrient supplies and  
80 socioeconomic status on epilepsy disease burden.

81 The results from 2018 are presented in Figure 1D as an example. This was the most recent year with  
82 relatively comprehensive data coverage. The modelled associations between macronutrient supplies and  
83 epilepsy incidence was presented as response surfaces mapped onto macronutrient supply plots. We  
84 focused on the effects of fat (*x*-axis) and carbohydrate (*y*-axis) supplies as they are the main variables in  
85 ketogenic diets. Protein supply was held at 25% (low), 50% (median) and 75% (high) quantiles of global  
86 supply. Within the modelling surfaces, red represented higher, while blue denoted lower epilepsy  
87 incidences.

88 Our modelling found that carbohydrate supply was strongly correlated with an increased epilepsy  
89 incidence, while fat supply had the opposite association, even after accounting for total energy supply  
90 (Figure 1D & Supplementary Table 1-2). This is visualized via the purple isocaloric line. Along this  
91 vector, the total nutrient energy supply was held constant, and carbohydrate was isocalorically replaced

92 with fat. A higher fat:carbohydrate ratio was linked to lower epilepsy burden, with the lowest epilepsy  
93 incidence found in an environment with high fat but low carbohydrate supplies (bottom right), with  
94 macronutrient compositions similar to ketogenic diets. Across increasing quantiles of protein supplies,  
95 there was a mild change of epilepsy incidence, suggesting a less prominent impact from protein. Epilepsy  
96 incidence appeared less influenced by the total energy supply from macronutrients, because along the red  
97 radial, altering the total energy supply but keeping the fat:carbohydrate unchanged, minimally impacted  
98 epilepsy disease burden.

99 Similarly, carbohydrate supply was also associated with increased epilepsy prevalence while fat supply  
100 had the opposite effect (Figure 1E & Supplementary Table 3-4). These associations were independent of  
101 sex (Supplementary Figure S1A-B). Notably, further analyses by sub-dividing plant- and animal-based  
102 fats revealed that they conferred similar effects on epilepsy disease burden (Supplementary Figure S1C).

103 Collectively, our work represents the first study to correlate epilepsy disease burden with global  
104 nutritional environments, as reflected by nutrient supplies. Our analyses unveil a potential beneficial role  
105 of fat for epilepsy disease burden, after correcting its plausible interactions with other macronutrients,  
106 total energy supply and socioeconomic status. Increased fat supply is linked to reduced epilepsy disease  
107 burden, particularly coupled with decreased carbohydrate supply, reflecting a dietary environment similar  
108 to ketogenic diets.

109 As in the original paper and other studies, ketogenic diets used in epilepsy tend to be relatively low in  
110 protein. Our analyses show that protein supply only mildly influenced the epilepsy disease burden,  
111 requiring further research to probe how protein contents might modify the effects of ketogenic diets. This  
112 might also be relevant for improving the compliance of ketogenic regimens. On the other hand, whilst the  
113 therapeutic effects of ketogenic diets for recalcitrant epilepsy are well-established, their effects in  
114 reducing the general incidence of epilepsy are unknown. Our analyses based on nutrient supplies, which  
115 might only partly reflect the actual dietary and nutritional patterns of the populations on an individual  
116 level, indicate a possible primary preventive role of a high fat low carbohydrate nutrient environment  
117 against epilepsy. This warrants further explorations for both ketogenic diets and less extreme high fat,  
118 moderate to low protein and low carbohydrate diets. Also, it remains to be interrogated at which  
119 developmental stage exposure to a high fat low carbohydrate environment will be the most beneficial for  
120 epilepsy prevention. Moreover, the original study discovered that ketone body  $\beta$ -hydroxybutyric acid is  
121 the main contributor to the therapeutic effect of ketogenic diets in epilepsy. Therefore, it would also be of  
122 interest to inspect which threshold levels of ketosis are required for epilepsy treatment or prevention,  
123 which can potentially instruct the design of more stratified ketogenic dietary regimens for epilepsy.

124 The underlying mechanisms of the amelioration of epilepsy by ketogenic diets seem to be multifaceted,  
125 involving both the gut-brain axis and microbiota<sup>8</sup>, and regional changes within the brain including  
126 accumulation of gamma-aminobutyric acid (GABA) and elevated GABA/glutamate ratio<sup>1</sup>. Interestingly,  
127 reduction in GABA was also observed in attention-deficit/hyperactivity disorder (ADHD), another  
128 neuronal disorder that could potentially be alleviated by ketogenic diets<sup>9</sup>. Recently, using similar analyses,  
129 we found that a high fat low carbohydrate food environment is also associated with reduced ADHD  
130 disease burden<sup>10</sup>. This suggested that the mechanisms underlying the beneficial roles of ketogenic diets in  
131 epilepsy and ADHD might be partially shared, further hinting the therapeutic potentials of ketogenic diets  
132 in other GABA-related neurological or mental disorders.

133 Together, our ecological analyses have revealed a robust association between a nutrient environment with  
134 high fat and low carbohydrate supplies and decreased epilepsy disease burden. This might expand the

135 clinical application of ketogenic diets and inform future nutrient-based epilepsy treatment and/or  
136 prevention.

137

138

## 139 **Figure Legend**

140 **Figure 1. Global associations of macronutrient supplies and epilepsy disease burden.** **A.** Global age-  
141 standardized prevalence (black) and incidence (red) of epilepsy of both sexes as functions of years. **B.**  
142 Global gross domestic product (GDP) per capita (in US dollars, black), and macronutrient supplies  
143 (carbohydrate: green, protein: blue, fat: cyan) as functions of years. **C.** A global overview of the age-  
144 standardized epilepsy incidence of both sexes in 2018. **D.** Modelled effects of macronutrient supplies on  
145 age-standardized epilepsy incidence rate of both sexes. **E.** Modelled effects of macronutrient supplies on  
146 age-standardized epilepsy prevalence rate of both sexes. (See Supplementary Information for statistics  
147 and interpretations).

148

## 149 **Acknowledgements**

150 This project is supported by the Norman Ernest Bequest Fund.

## 151 **Author Contributions**

152 *Concept and design:* D.N., and R.N..

153 *Acquisition, analysis, and interpretation of data:* D.N., A.S., D.R., S.S., and R.N..

154 *Drafting of the manuscript:* D.N., and R.N..

155 *Critical revision of the manuscript for important intellectual content:* All authors.

## 156 **Conflict of Interests:**

157 None reported.

158

159

160

161

162

163

164

165 **References:**

166 1 Qiao YN, Li L, Hu SH *et al.* Ketogenic diet-produced beta-hydroxybutyric acid accumulates brain GABA  
167 and increases GABA/glutamate ratio to inhibit epilepsy. *Cell Discov* 2024; **10**:17.

168 2 D'Andrea Meira I, Romao TT, Pires do Prado HJ, Kruger LT, Pires MEP, da Conceicao PO. Ketogenic Diet  
169 and Epilepsy: What We Know So Far. *Front Neurosci* 2019; **13**:5.

170 3 Wells J, Swaminathan A, Paseka J, Hanson C. Efficacy and Safety of a Ketogenic Diet in Children and  
171 Adolescents with Refractory Epilepsy-A Review. *Nutrients* 2020; **12**.

172 4 Verrotti A, Iapadre G, Di Francesco L, Zagaroli L, Farello G. Diet in the Treatment of Epilepsy: What We  
173 Know So Far. *Nutrients* 2020; **12**.

174 5 Devinsky O, Vezzani A, O'Brien TJ *et al.* Epilepsy. *Nat Rev Dis Primers* 2018; **4**:18024.

175 6 Ni D, Senior AM, Raubenheimer D, Simpson SJ, Macia L, Nanan R. Global associations of macronutrient  
176 supply and asthma disease burden. *Allergy* 2024.

177 7 Senior AM, Nakagawa S, Raubenheimer D, Simpson SJ. Global associations between macronutrient  
178 supply and age-specific mortality. *Proc Natl Acad Sci U S A* 2020; **117**:30824-30835.

179 8 Lum GR, Ha SM, Olson CA *et al.* Ketogenic diet therapy for pediatric epilepsy is associated with  
180 alterations in the human gut microbiome that confer seizure resistance in mice. *Cell Rep* 2023;  
181 **42**:113521.

182 9 Liu Y, Yang C, Meng Y, Dang Y, Yang L. Ketogenic diet ameliorates attention deficit hyperactivity disorder  
183 in rats via regulating gut microbiota. *PLoS One* 2023; **18**:e0289133.

184 10 Ni D, Senior A, Raubenheimer D, Simpson SJ, Nanan R. Plant-based fat supply is associated with  
185 reduced ADHD disease burden. *medRxiv* 2024.

186

Figure 1. Global associations of macronutrient supplies and epilepsy disease burden.

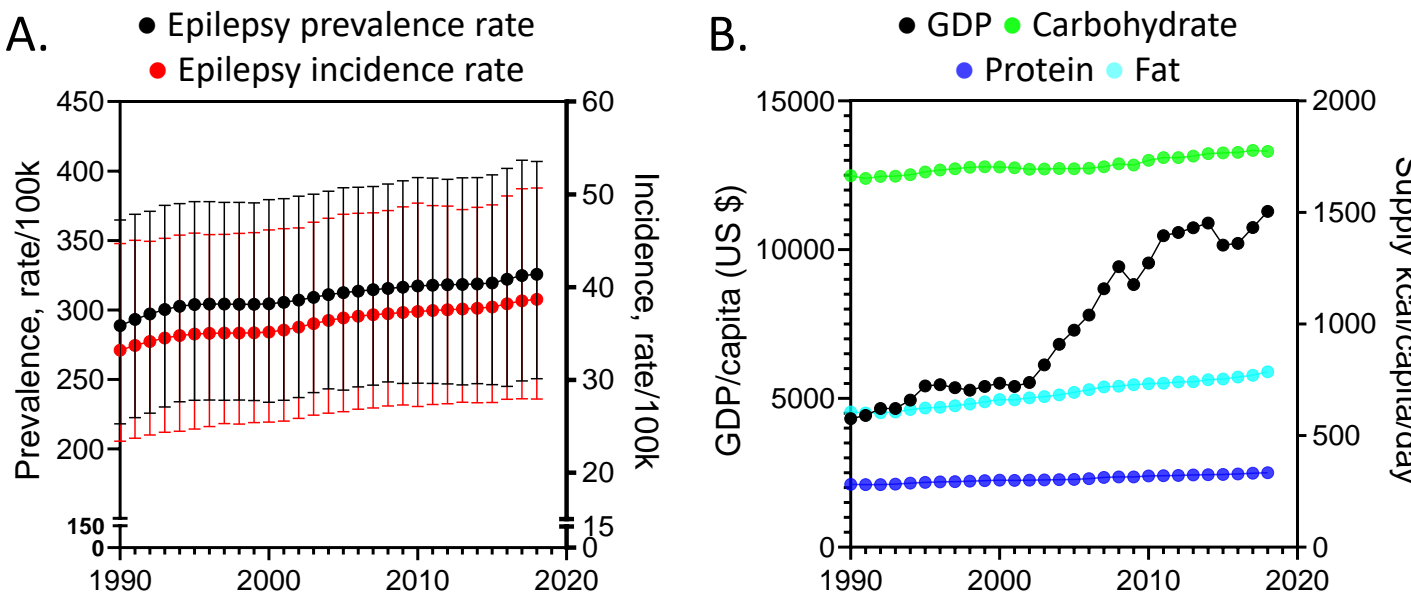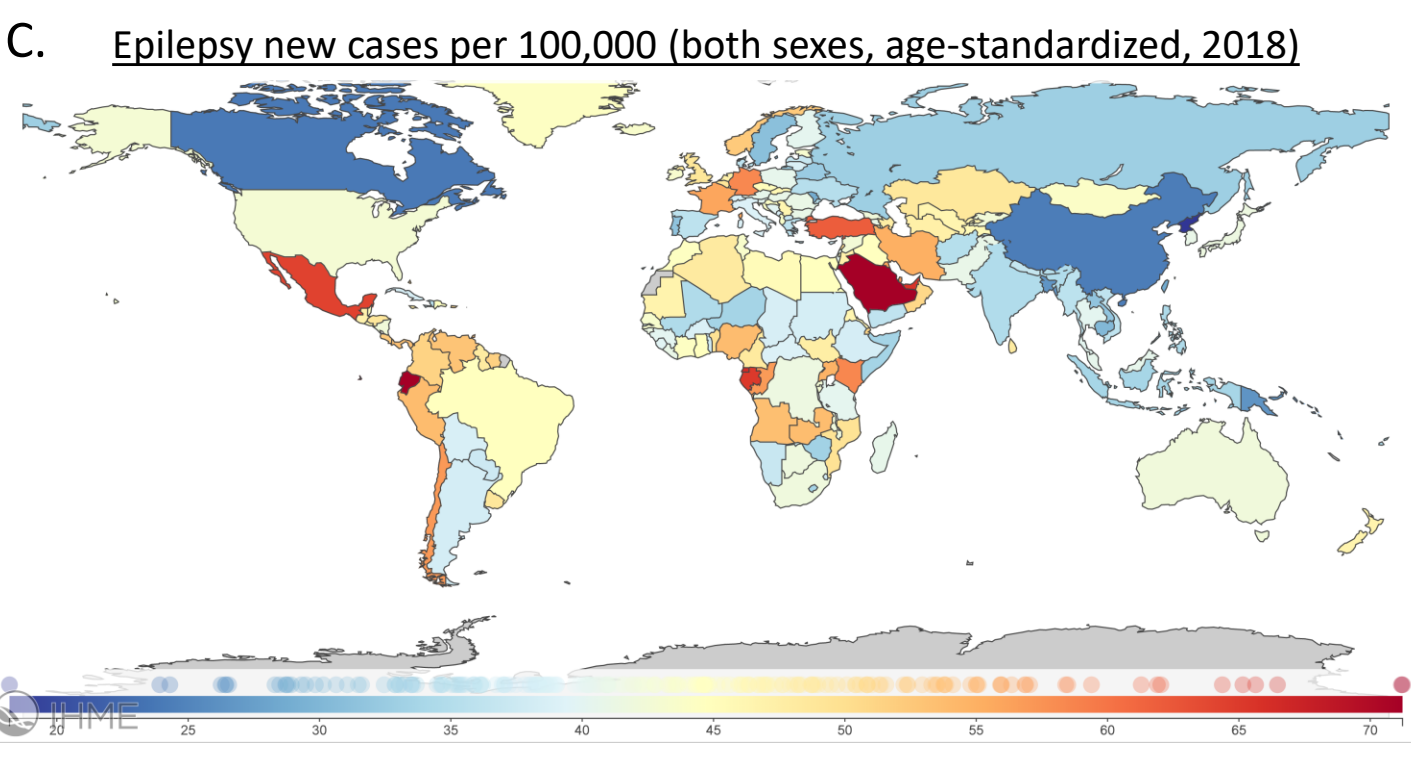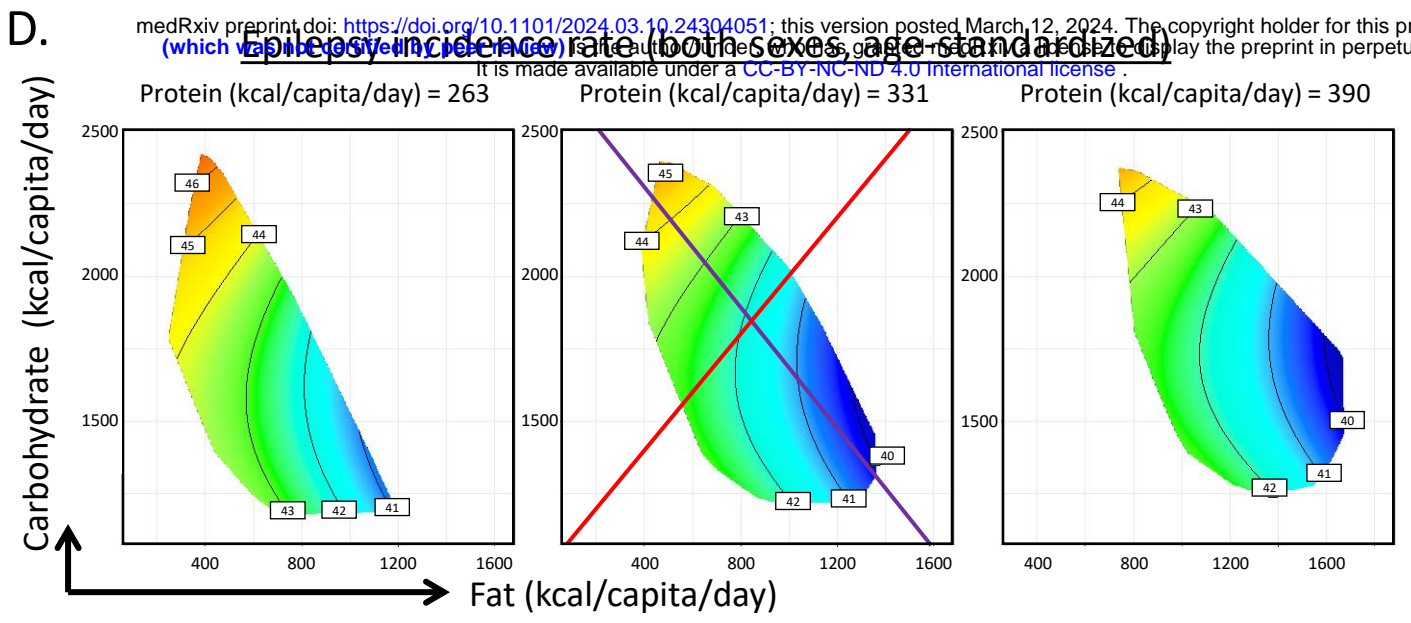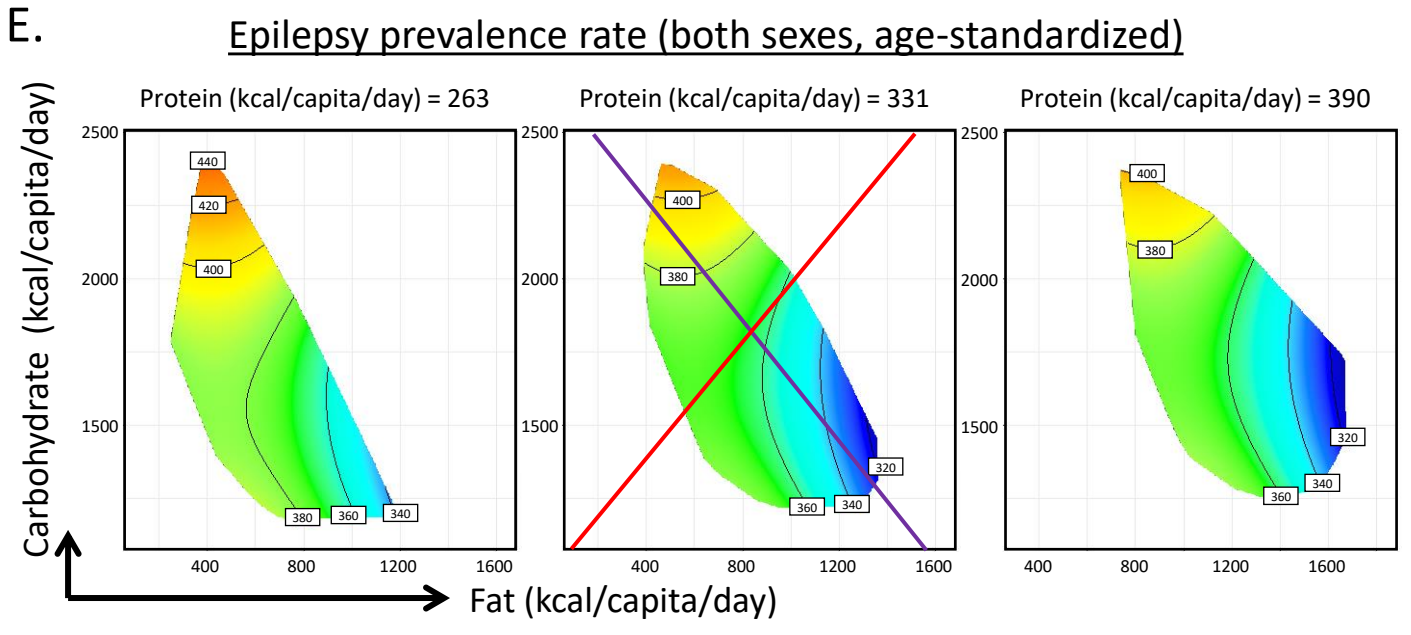

Source: https://medrxiv.org/content/10.1101/2024.03.10.24304051v1.full.pdf
